# Supplementary material for: Allostatic Load Predicts Symptom Burden Among Breast Cancer Survivors
Source: Research Square preprint supplement (doi:10.21203/rs.3.rs-9521147/v1), 2026-05-14
Supplement: Supplementary file 1 [file 9d724fa5b96fce645bd15123.docx]

Supplement Table 1. Summary of biomarkers that were used to construct AL (N=2888)

| Biomarker | Mean (SD) | Risk% (N) |
| --- | --- | --- |
| Waist-Hip Ratio | 0.84 (0.08) | 35.7% (1032) |
| Hypertension | 70.03 (10.74) | 0.8% (24) |
| SBP | 136.42 (18.26) | 40.6% (1173) |
| DBP | 81.32 (9.89) | 18.9% (547) |
| CRP | 2.28 (3.75) | 18.6% (536) |
| HbA1c | 35.62 (4.68) | 1.3% (38) |
| Triglycerides | 1.61 (0.9) | 32.9% (950) |
| Creatinine | 67.83 (13.13) | 0.8% (23) |
| LDL | 3.66 (0.87) | 59.8% (1728) |
| HDL | 1.59 (0.39) | 4.3% (124) |
| Cholesterol | 5.91 (1.13) | 73.5% (2124) |

| Outcome | Prevalence beta (95% CI) | Prevalence P value | No cancer beta (95% CI) | No cancer P value |
| --- | --- | --- | --- | --- |
| PSQI | 0.18 (0.06, 0.29) | 0.003 | -0.02 (-0.12, 0.08) | 0.719 |
| Fatigue | 0.23 (0.12, 0.35) | <0.001 | 0.01 (-0.09, 0.10) | 0.872 |
| Functional limitation | 0.28 (0.09, 0.47) | 0.003 | 0.19 (0.04, 0.34) | 0.011 |
| PHQ-9 | 0.15 (0.02, 0.28) | 0.029 | 0.04 (-0.07, 0.15) | 0.458 |
| GAD-7 | 0.12 (0.01, 0.23) | 0.036 | -0.11 (-0.21, -0.01) | 0.036 |
| Self-rated mental health (z) | -0.09 (-0.13, -0.05) | <0.001 | -0.04 (-0.07, -0.01) | 0.007 |
| Cognitive function | 0.08 (-0.04, 0.21) | 0.19 | 0.00 (-0.09, 0.10) | 0.971 |

Supplement Table 2 Associations between Allostatic Load and Symptom Outcomes among Breast Cancer Survivors and Women without Cancer

Supplement Table 3. Model Fit Statistics for Latent Class Models with Five and Six Symptom Domains

| Domains | Number of Classes | Log-likelihood | AIC | BIC |
| --- | --- | --- | --- | --- |
| Six domains | 2 | -4964.2 | 9954.4 | 10022.98 |
|  | 3 | -4871.97 | 9783.95 | 9889.45 |
|  | 4 | -4816.15 | 9686.3 | 9828.73 |
|  | 5 | -4809.18 | 9686.36 | 9865.71 |
|  | 6 | -4802.92 | 9687.84 | 9904.12 |

| Supplement Table 4. Association between baseline AL and symptoms during follow-up stratified by SES among breast cancer | | | | | | |
| --- | --- | --- | --- | --- | --- | --- |
|  | Number | b Coefficient (95% CI) | P value* | Number | b Coefficient (95% CI) | P value* |
| **By education level** |  | **>High school** |  |  | **≤High school** |  |
| PSQI | 635 | 0.03 (-0.14, 0.20) | 0.723 | 541 | 0.31 (0.12, 0.49) | 0.001 |
| Fatigue | 617 | 0.11 (-0.05, 0.28) | 0.186 | 559 | 0.40 (0.21, 0.59) | <0.001 |
| Depression | 484 | 0.01 (-0.19, 0.21) | 0.916 | 445 | 0.22 (0.01, 0.44) | 0.043 |
| Anxiety | 575 | 0.08 (-0.08, 0.24) | 0.328 | 484 | 0.09 (-0.11, 0.28) | 0.376 |
| Cognitive function | 635 | 0.10 (-0.09, 0.28) | 0.302 | 541 | 0.06 (-0.16, 0.27) | 0.608 |
| Functional limitation | 635 | 0.21 (-0.04, 0.47) | 0.105 | 541 | 0.41 (0.08, 0.74) | 0.014 |
| Self-rated health | 574 | -0.08 (-0.14, -0.02) | 0.011 | 483 | -0.11 (-0.18, -0.05) | <0.001 |
| **By income level** |  | **≤£30,999** |  |  | **>£30,999** |  |
| PSQI | 498 | 0.25 (0.05, 0.45) | 0.015 | 678 | 0.12 (-0.05, 0.28) | 0.161 |
| Fatigue | 498 | 0.27 (0.07, 0.47) | 0.009 | 678 | 0.28 (0.11, 0.44) | <0.001 |
| Depression | 445 | 0.07 (-0.17, 0.31) | 0.554 | 614 | 0.16 (-0.03, 0.34) | 0.101 |
| Anxiety | 445 | 0.13 (-0.07, 0.32) | 0.206 | 614 | 0.05 (-0.11, 0.22) | 0.515 |
| Cognitive function | 498 | 0.18 (-0.03, 0.38) | 0.088 | 678 | -0.02 (-0.21, 0.17) | 0.823 |
| Functional limitation | 498 | 0.32 (-0.05, 0.69) | 0.088 | 678 | 0.34 (0.11, 0.57) | 0.004 |
| Self-rated health | 444 | -0.10 (-0.17, -0.03) | 0.004 | 613 | -0.09 (-0.15, -0.04) | 0.001 |
